1  
2  
3  
4  
5 **The roseoloviruses downregulate the protein tyrosine phosphatase PTPRC (CD45)**  
6  
7  
8  
9

10  
11  
12  
13 *Melissa L. Whyte<sup>1</sup>, Kelsey Smith<sup>1</sup>, Amanda Buchberger<sup>2,4</sup>, Linda Berg Luecke<sup>4</sup>, Lidya*  
14 *Handayani Tjan<sup>3</sup>, Yasuko Mori<sup>3</sup>, Rebekah L Gundry<sup>2,4</sup>, and Amy W. Hudson<sup>1#</sup>*  
15  
16  
17  
18  
19  
20  
21  
22  
23  
24  
25  
26

27 *1: Department of Microbiology and Immunology, Medical College of Wisconsin, Milwaukee, WI*  
28 *2. Department of Biochemistry, Medical College of Wisconsin, Milwaukee, WI*  
29 *3. Division of Clinical Virology, Kobe University Graduate School of Medicine, Kobe, Japan*  
30 *4: Current address: CardiOmics Program, Center for Heart and Vascular Research; Division of*  
31 *Cardiovascular Medicine; and Department of Cellular and Integrative Physiology, University of*  
32 *Nebraska Medical Center, Omaha, NE*  
33  
34  
35

36 *#To whom correspondence should be addressed: [ahudson@mcw.edu](mailto:ahudson@mcw.edu)*  
37  
38  
39

40 *Running title: Roseolovirus downregulation of CD45*  
41  
42  
43  
44  
45  
46

47 **Abstract**

48 Like all herpesviruses, the roseoloviruses (HHV6A, -6B, and -7) establish lifelong  
49 infection within their host, requiring these viruses to evade host anti-viral responses.  
50 One common host-evasion strategy is the downregulation of host-encoded, surface-  
51 expressed glycoproteins. Roseoloviruses have been shown to evade host the host  
52 immune response by downregulating NK-activating ligands, MHC class I, and the  
53 TCR/CD3 complex. To more globally identify glycoproteins that are differentially  
54 expressed on the surface of HHV6A-infected cells, we performed cell surface capture of  
55 N-linked glycoproteins present on the surface of T cells infected with HHV6A, and  
56 compared these to proteins present on the surface of uninfected T cells. We found that  
57 the protein tyrosine phosphatase CD45 is downregulated in T cells infected with  
58 HHV6A. We also demonstrated that CD45 is similarly downregulated in cells infected  
59 with HHV-7. CD45 is essential for signaling through the T cell receptor and as such, is  
60 necessary for developing a fully functional immune response. Interestingly, the closely  
61 related  $\beta$ -herpesviruses human cytomegalovirus (HCMV) and murine cytomegalovirus  
62 (MCMV) have also separately evolved unique mechanisms to target CD45. While  
63 HCMV and MCMV target CD45 signaling and trafficking, HHV6A acts to downregulate  
64 CD45 transcripts.

65 **Importance**

66 Human herpesviruses-6 and -7 infect essentially 100% of the world's population before  
67 the age of 5 and then remain latent or persistent in their host throughout life. As such,  
68 these viruses are among the most pervasive and stealthy of all viruses. Host immune

69 cells rely on the presence of surface-expressed proteins to identify and target virus-  
70 infected cells. Here, we investigated the changes that occur to proteins expressed on  
71 the cell surface of T cells after infection with human herpesvirus-6A. We discovered  
72 that HHV-6A infection results in a reduction of CD45 on the surface of infected cells.  
73 Targeting of CD45 may prevent activation of these virus-infected T cells, possibly  
74 lengthening the life of the infected T cell so that it can harbor latent virus.

## 75 **Introduction**

76 Human Herpesvirus-6A (HHV6A) is a human-specific, T cell-tropic  $\beta$ -herpesvirus that is  
77 most closely related to the other members of the roseolovirus genus, HHV-6B and HHV-  
78 7, as well as human cytomegalovirus (HCMV). Primary infections with HHV-6 and -7  
79 usually occur before the age of three and are often characterized by a high fever (1, 2).  
80 HHV-6 and -7 infect over 90% of the population, and like other herpesviruses, HHV-6  
81 and -7 remain latent or establish lifelong infections in their hosts. As such, these viruses  
82 are among the most pervasive and stealthy of all viruses; they must necessarily excel at  
83 escaping immune detection throughout the life of the host, yet little is known about how  
84 these viruses so successfully escape host defenses.

85 The ability of host immune cells to detect virus-infected cells is largely dependent on  
86 interactions between proteins expressed on the surface of immune cells and those  
87 expressed on the surface of their targets. Viruses have necessarily evolved to alter the  
88 expression of these cell-surface-expressed proteins to evade detection by the host  
89 immune system. The herpesviruses, particularly the cytomegaloviruses, have long been  
90 known to employ devious strategies to interfere with expression of host-encoded  
91 surface-expressed proteins. For example, most herpesviruses, including HHV-6 and -7,  
92 interfere with antigen presentation by downregulating class I major histocompatibility  
93 complex (MHC) molecules from the surface of infected cells (4-13). Additionally, HCMV,  
94 the most closely-related virus to the roseoloviruses, encodes at least 5 different gene  
95 products and a miRNA that all participate in downregulation of natural killer (NK)-  
96 activating ligands, all in an effort to prevent natural killer cells from identifying and killing  
97 infected cells (14-18). We have found that HHV6A, -6B, and -7 each encode a single

98 gene product, U21, that acts as a multifunctional transmembrane glycoprotein to  
99 downregulate not only multiple NK activating ligands, but also most class I MHC alleles  
100 (12, 19-21).

101 Herpesviruses also target surface-expressed proteins to hinder the ability of immune  
102 cells to perform their effector function. For example, herpesviruses inhibit T cell function  
103 through the downregulation of co-stimulatory ligands like B7 and CD40, and  
104 upregulation of co-inhibitory ligands such as PD-L1 and galectin-9 (22-32).

105 Herpesviruses also downregulate adhesion molecules, such as I-CAM, V-CAM, PECAM  
106 and ALCAM, which can physically disrupt formation of the immune synapse and inhibit  
107 T cell activation (33-37).

108 Since most herpesviruses are not T cell-tropic, changes in surface expression occur in  
109 infected cells, and infected cells then exert their immunosuppressive effects through  
110 interaction with uninfected T cells. But what happens to the surface of a T cell when it is  
111 infected with a herpesvirus? The T cell-tropic roseoloviruses allow us to explore and  
112 learn from alterations to the glycoprotein landscape on the surface of herpesvirus-  
113 infected T cells. Herein, we applied a mass spectrometry strategy to identify and  
114 quantify N-linked glycoproteins on the cell surface of HHV6A-infected T cells to yield the  
115 first insights into how virus infection induces alterations in the cell surface landscape of  
116 host cells. We discovered that the protein tyrosine phosphatase CD45 (PTPRC) is  
117 downregulated from the surface of HHV6A-infected T cells. CD45 is expressed on the  
118 surface of all nucleated cells of hematopoietic origin, where its activity is critical for the  
119 proper function of immune cells (reviewed in (39-42)). The phosphatase activity of CD45  
120 is required for successful signaling through the TCR (43-45), and as such, the

121 downregulation of CD45 could be an attractive strategy for viruses to impair T cell  
122 signaling.

## 123 **Results**

### 124 *Cell-surface capture of CD45 in HHV6A-infected T cells*

125 To identify host-encoded surface-expressed proteins targeted by HHV6A, we performed  
126 cell surface capture (CSC), a chemoproteomic approach for the specific identification of  
127 cell surface N-glycoproteins (46-50). Using CSC and bioinformatic analysis tools, we  
128 compared N-linked glycoproteins identified on the surface of T cells infected with  
129 HHV6A to those identified on the surface of uninfected T cells (3, 38). To minimize  
130 biological variability, we performed CSC in HHV6A-infected cell line. HHV6A infects  
131 only a small number of cultured cell lines, and for these studies, we used JJhan cells, a  
132 CD4<sup>+</sup> T cell line variant of Jurkat cells (51).

133 We identified 605 cell surface N-linked glycoproteins on the surface of infected and  
134 uninfected JJhan cells, including 594 human and 11 viral proteins. Strikingly, we  
135 identified 47 unique peptides derived from the protein tyrosine phosphatase PTPRC  
136 (CD45), spanning all 22 N-linked glycosylation sites (Fig. 1a). CD45-derived peptides  
137 were consistently less abundant on the surface of HHV6A-infected JJhan cells across  
138 multiple biological and technical replicates (Fig. 1b-d), suggesting that CD45 is  
139 downregulated from the surface of HHV6A-infected JJhan cells.

### 140 *Localization and steady-state expression of CD45 in HHV6A-infected T cells*

141 To independently validate the  
 142 downregulation of CD45  
 143 observed in our mass  
 144 spectrometry experiments, we  
 145 examined surface-expression of  
 146 CD45 in HHV6A-infected cells by  
 147 flow cytometry. We infected  
 148 JJhan cells with a recombinant,  
 149 bacterial artificial chromosome  
 150 (BAC)-derived HHV6A virus  
 151 encoding soluble green  
 152 fluorescent protein (GFP), which  
 153 allowed us to identify actively-  
 154 infected cells (52). In uninfected  
 155 JJhan cells, we observed a single  
 156 population of CD45-expressing  
 157 cells, while in HHV6A-infected  
 158 JJhan cells, we observed  
 159 reduced surface expression of CD45 (Fig. 2a), consistent with our mass spectrometry  
 160 finding that the presence of CD45 is diminished on the surface of HHV6A-infected cells.  
 161 CD45 is expressed as multiple different isoforms in human cells (53-55). To determine  
 162 whether all isoforms of CD45 are downregulated in HHV6A-infected JJhan cells, we  
 163 labeled cells with antibodies directed against the CD45 isoforms commonly expressed

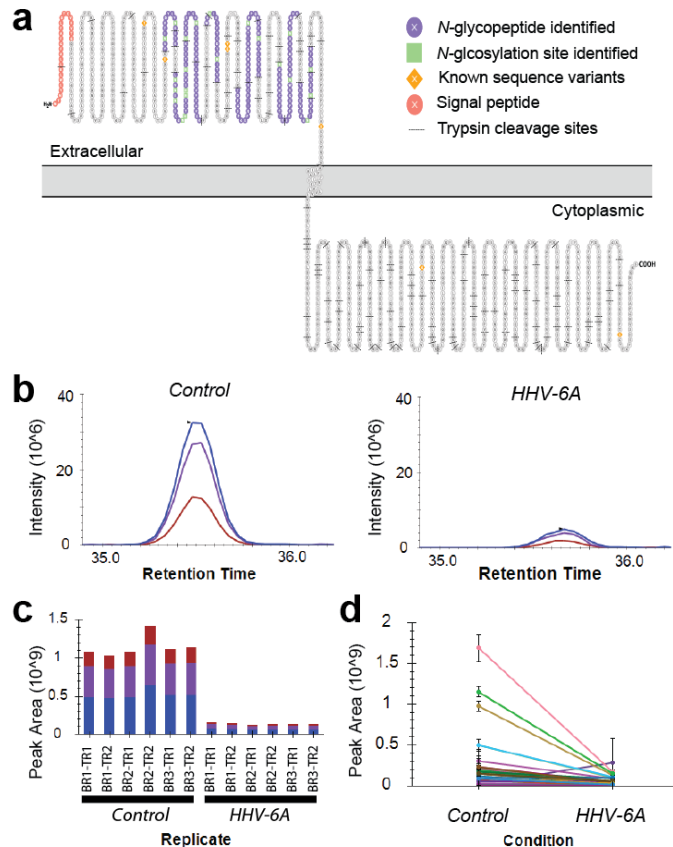

**Figure 1. Mass spectrometry data for CD45.** (a) Graphical representation of CD45 protein with extracellular N-linked glycopeptides identified by CSC indicated. This approach specifically enriches and identifies N-glycopeptides from the extracellular domain of cell surface proteins. Image generated using Protter (3). (b-d) Label-free quantitation data for CD45. Representative peaks of a peptide (YAnITVDYLYNK, where n is the site of N-glycosylation) detected across individual replicate analyses (b) and three replicate analyses (including technical replicates) (c) for each sample group, showing CD45 is more abundant in control compared to infected cells. Each color (blue, purple, and red) are associated with the peak area from the [M]+0, [M]+1, and [M]+2 isotopic peaks, respectively. [M] is the monoisotopic mass. (d) Summary of peak areas for all 67 peptide observations for CD45 across all technical and biological replicates. Each line is a different peptide. BR: biological replicate; TR: technical replicate. Results shown in b-d were generated using Skyline (38).

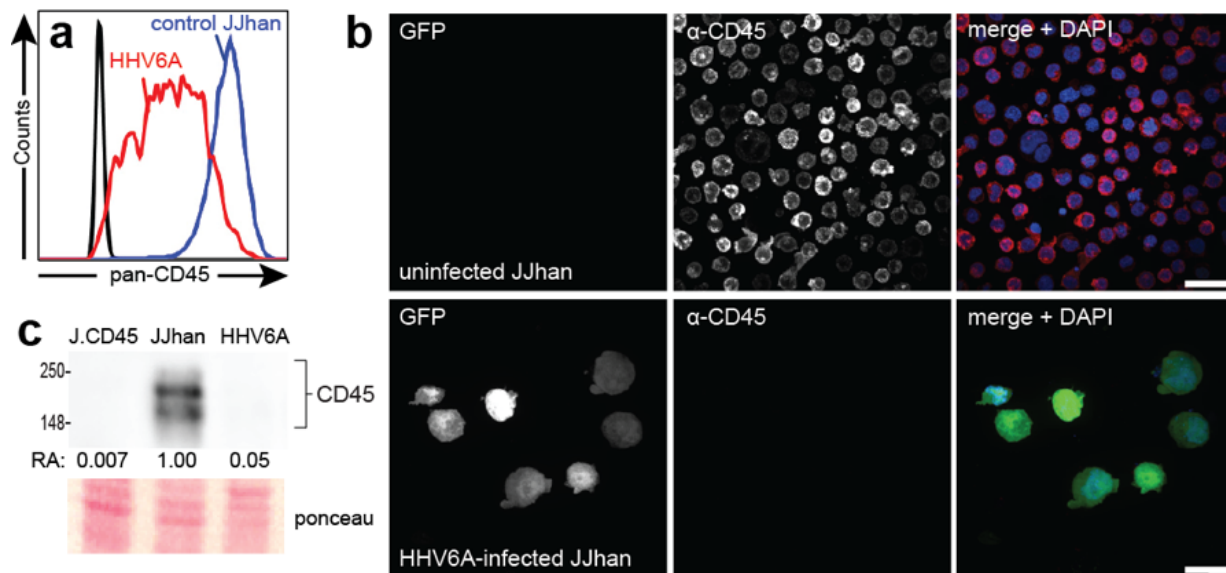

**Figure 2. CD45 is downregulated in HHV6A-infected cells.** (a) Flow cytometric analysis of HHV6A-infected JJhan cells (red) and uninfected JJhan cells (blue). HHV6A-infected cells were gated on as GFP<sup>+</sup>. Live cells were labeled with an antibody directed against CD45. (b) Confocal immunofluorescence microscopy images showing uninfected JJhan cells (top panels) and HHV6A-infected (GFP<sup>+</sup>) JJhan cells (bottom panels) that were fixed, permeabilized, and labeled with an antibody directed against CD45. Images were taken at 100X magnification and are shown as maximum intensity projections. Scale bar = 20  $\mu$ m. (c) Immunoblot analysis of CD45 in whole cell lysates generated from J.CD45 cells (negative control), uninfected JJhan cells, and HHV6A-infected JJhan cells. Protein was normalized to total protein for each lane. RA : relative abundance. Abundance is calculated relative to uninfected JJhan cells. Ponceau shows total protein loaded per lane.

164 in Jurkat cells, the parental cell line of JJhan cells (56). CD45-RO, -RB, and -RC were  
165 all downregulated in HHV6A-infected JJhan cells relative to uninfected JJhan cells (Fig.  
166 S1), suggesting the downregulation of CD45 from the surface HHV6A-infected JJhan  
167 cells is not specific to any one CD45 isoform.

168 Viruses often reroute the intracellular trafficking of surface-expressed proteins from the  
169 cell surface to alter host cell biology. For example, the HHV6A U24 gene product  
170 downregulates the T-cell receptor (TCR)/CD3 by stimulating endocytosis of the receptor  
171 resulting in relocalization of TCR/CD3 from the cell surface to endosomes, and U21  
172 reroutes class I MHC molecules to lysosomes (13, 57). We therefore sought to  
173 determine whether the reduction in surface-expressed CD45 observed in HHV6A-  
174 infected cells was the result of a redistribution of CD45 within the cell. To examine the  
175 localization of CD45, we performed immunofluorescence microscopy of permeabilized



176 cells labeled with an antibody directed against human CD45. As expected, CD45 was  
177 localized to the plasma membrane in uninfected JJhan T cells. In HHV6A-infected  
178 JJhan cells, however, we observed a striking disappearance of CD45 labeling ([Fig. 2b](#)).

179 To better quantify the downregulation of CD45 in HHV6A-infected JJhan cells, we next  
180 examined steady-state levels of CD45 protein by immunoblot analysis of whole-cell  
181 lysates generated from uninfected or HHV6A-infected JJhan cells. Consistent with our  
182 immunofluorescence microscopy data ([Fig. 2b](#)), immunoblot analysis showed a 95%  
183 reduction in CD45 protein in HHV6A-infected JJhan cells relative to uninfected JJhan  
184 cells ([Fig. 2c](#)). Taken together, these results demonstrate that CD45 is not only  
185 downregulated from the surface of HHV6A-infected JJhan cells but is also depleted  
186 from HHV6A-infected cells.

#### 187 *CD45 expression in HHV7-infected T cells*

188 The HHV6A genome is almost entirely co-linear with the two other roseolovirus  
189 genomes HHV-6B and HHV-7 (58, 59). As such, we reasoned that HHV-6B and HHV-7  
190 infection may also result in CD45 downregulation. To determine whether CD45 is  
191 downregulated in HHV7-infected cells, we evaluated the localization of CD45 in HHV7-  
192 infected SupT1 cells by immunofluorescence microscopy. Since a recombinant GFP-  
193 containing BAC containing the coding sequence of HHV-7 is not yet available, we  
194 identified HHV7-infected cells using an antibody directed against the U21 gene product  
195 from HHV-7 ([Fig. 3](#), green). Similar to cells infected with HHV6A ([Fig. 2b](#)), HHV7-  
196 infected SupT1 cells showed reduced CD45 labeling ([Fig. 3](#), bottom panels as

197 compared to  
198 uninfected  
199 SupT1 cells  
200 (Fig. 3, top  
201 panels),  
202 suggesting that  
203 the ability to  
204 downregulate  
205 CD45 is  
206 common to all  
207 roseoloviruses.

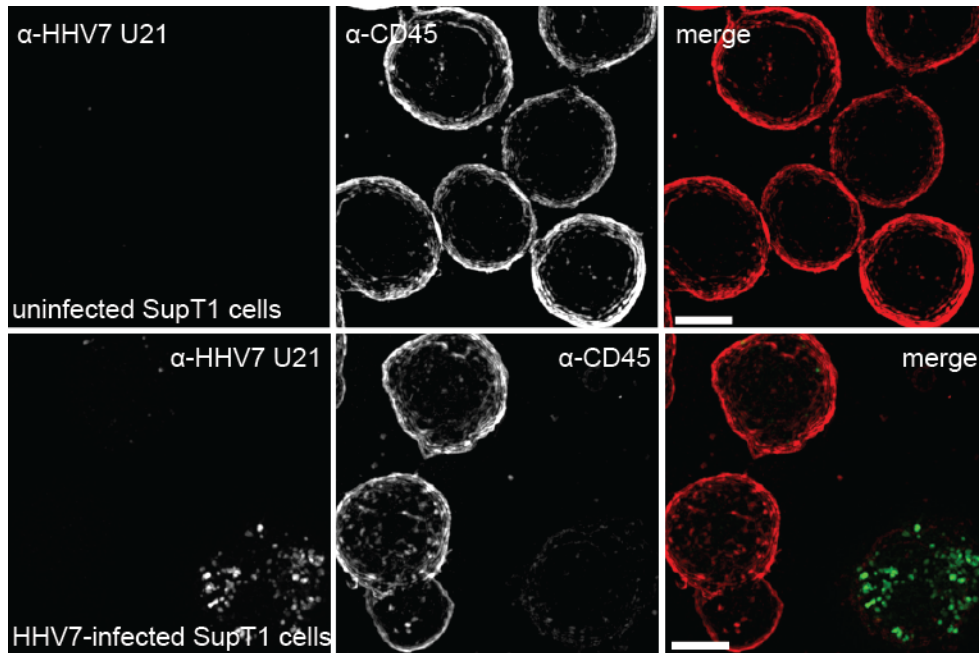

**Figure 3. CD45 is downregulated in HHV7-infected T cells.** Structured Illumination 3-dimensional microscopy images showing uninfected control T cells (top panels) and HHV7-infected T cell (bottom panels). Fixed and permeabilized cells were labeled with an antibody directed against the U21 open reading frame (ORF) from HHV7 (green) and an antibody directed against human CD45 (red). Images were taken at 100X and are shown as maximum intensity projections. Scale bar = 5  $\mu$ m.

#### 208 *CD45 protein stability in HHV6A-infected T cells*

209 Viruses often employ the strategy of degrading host proteins involved in the host  
210 response to virus infection. For example, the murine cytomegalovirus m42 gene product  
211 induces internalization and subsequent proteasomal degradation of CD45 (60). To  
212 further investigate the mechanism by which CD45 is downregulated in HHV6A-infected  
213 JJhan cells, we examined the stability of CD45 in the presence of proteasomal and  
214 lysosomal protease inhibitors.

215 Lysosomal protease function is compromised at a more neutral pH, thus stabilization of  
216 a protein in the presence of the weak base ammonium chloride ( $\text{NH}_4\text{Cl}$ ) would suggest  
217 the involvement of lysosomal proteases in its turnover. Likewise, stabilization of a  
218 protein in the presence of the peptide-aldehyde MG-132, which selectively inhibits

219 proteolytic activity of the 26S  
220 proteasome, would suggest  
221 involvement of proteasomal  
222 proteases in the turnover of that  
223 protein. We separately inhibited  
224 lysosomal and proteasomal  
225 protein degradation, treating  
226 cells with  $\text{NH}_4\text{Cl}$  or MG-132, and  
227 assessed steady-state CD45  
228 protein levels by immunoblot  
229 analysis. In cells treated with a  
230 DMSO vehicle control, we  
231 observed a 95% reduction in  
232 CD45 abundance in HHV6A-  
233 infected cells (Fig 4a), which is  
234 similar to what we observed in untreated cells (Fig. 2c), suggesting the dimethyl  
235 sulfoxide (DMSO) vehicle does not affect degradation of CD45. We observed a similar  
236 reduction in CD45 in cells treated with MG-132 or  $\text{NH}_4\text{Cl}$  (Fig. 4a).  
237 We also examined localization of CD45 in HHV6A-infected cells treated with MG-132 or  
238  $\text{NH}_4\text{Cl}$  by immunofluorescence microscopy. As expected, we observed surface-  
239 localization of CD45 in untreated, uninfected JJhan cells (Fig. S2, panel a). We also  
240 observed surface-localization of CD45 in uninfected JJhan cells treated with a DMSO  
241 vehicle, MG-132, or  $\text{NH}_4\text{Cl}$  (Fig. S2, panels b, c, and d, respectively), suggesting CD45

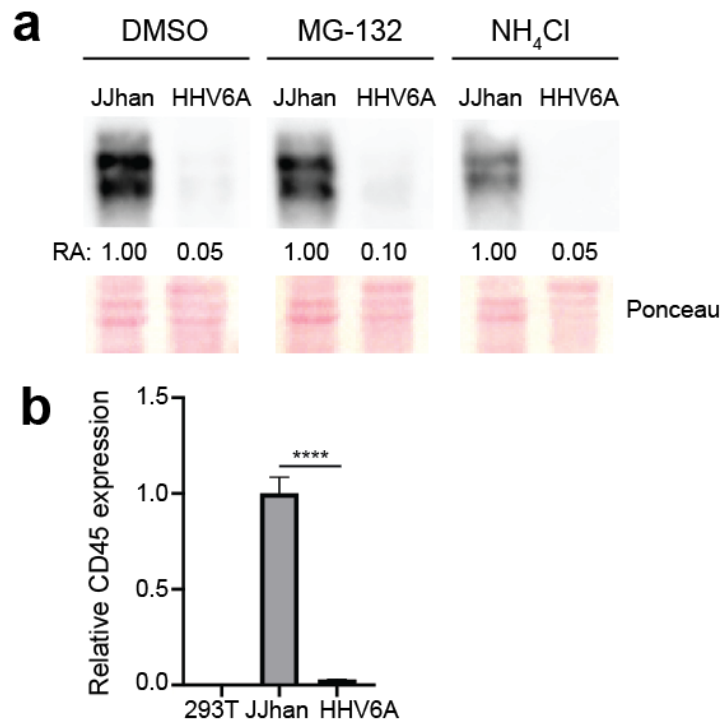

**Figure 4. CD45 is downregulated at the RNA level in HHV6A-infected T cells.** (a) Immunoblot analysis showing steady-state abundance of CD45 protein in uninfected JJhan cells, or HHV6A-infected cells under different conditions (DMSO vehicle control, MG-132, or  $\text{NH}_4\text{Cl}$  treatment for 19 hours). Equal protein was loaded in each lane, and CD45 abundance was calculated relative to uninfected JJhan cells for each treatment. RA = relative abundance. Ponceau-stained lanes visually illustrate equal protein loading. (b) CD45 RNA abundance in 293T cells (negative control), uninfected JJhan cells, or HHV6A-infected cells. CD45 RNA abundance is calculated relative to a cellular control gene and shown here relative to uninfected JJhan cells. Data shown is from a single representative biological replicate, performed in technical triplicate for each sample, mean  $\pm$  SD. \*\*\*\* =  $p < 0.0001$ .

242 localization is not affected by treatment with MG-132 or NH<sub>4</sub>Cl outside the context of an  
243 HHV6A infection. Consistent with the immunoblot data, there was little to no CD45  
244 labeling present in untreated HHV6A-infected JJhan cells (Fig. S2, panel e). Similarly,  
245 there was little to no CD45 labeling in HHV6A-infected treated with a DMSO vehicle,  
246 MG-132, or NH<sub>4</sub>Cl (Fig. S2, panels f, g, & h, respectively). Taken together, these results  
247 suggest that the downregulation of CD45 in HHV6A-infected JJhan cells occurs by  
248 some method other than protein degradation.

#### 249 *CD45 gene expression in HHV6A-infected T cells*

250 Because CD45 was not stabilized in the presence of proteasomal or lysosomal  
251 inhibitors, we hypothesized that CD45 was downregulated at the transcript level in  
252 HHV6A-infected T cells. To test this hypothesis, we quantified CD45 mRNA in  
253 uninfected and HHV6A-infected JJhan cells by quantitative reverse transcriptase-  
254 polymerase chain reaction (qRT-PCR). CD45 mRNA levels were greatly reduced in  
255 JJhan cells infected with HHV6A as compared to uninfected JJhan cells (Fig. 4b),  
256 suggesting that CD45 transcripts are downregulated in HHV6A-infected JJhan cells.

## 257 **Discussion**

258 Herpesviruses, as life-long pathogens, are especially masterful at reprogramming host  
259 cells to create a more hospitable environment. Perhaps the greatest challenge to a virus  
260 is the detection and killing of its host cell by immune cells. As discussed, the  
261 herpesviruses encode multiple gene products that alter host cell biology to prevent the  
262 identification of infected cells. These measures are not entirely sufficient, however, and  
263 viruses also strategize to target immune cells to inhibit their functional capacity. One

264 way viruses can inhibit these processes is by targeting the proteins that are important  
265 for immune cell function, such as the protein tyrosine phosphatase CD45.

266 CD45 is expressed on the surface of all nucleated cells of hematopoietic origin, where  
267 its activity is critical for the proper function of immune cells (reviewed in (39-42)). In T  
268 cells, CD45's primary substrates are Src family kinases (61-63). CD45  
269 dephosphorylates the inhibitory phosphotyrosine residue on the Src kinase Lck, leaving  
270 the kinase in a 'primed' state, so that it can be activated through T cell receptor (TCR)  
271 signaling (62). The phosphatase activity of CD45 is required for successful signaling  
272 through the TCR (43-45), and as such, the downregulation of CD45 could be an  
273 attractive strategy for viruses to inhibit T cell signaling.

274 Here we describe the downregulation of CD45 by two roseoloviruses, HHV6A and HHV-  
275 7. Expression of CD45 is markedly reduced in HHV6A-infected JJhan cells and HHV7-  
276 infected SupT1 cells. While we do not yet fully understand the functional consequences  
277 of CD45 downregulation in roseolovirus-infected cells, we can gather clues from three  
278 other viruses also known to target CD45: human cytomegalovirus (HCMV), human  
279 adenovirus, and murine cytomegalovirus (MCMV).

280 CD45 is targeted by HCMV pUL11 (64). The extracellular domain of pUL11, which is  
281 expressed on the surface of HCMV-infected epithelial cells or fibroblasts, interacts with  
282 CD45 on nearby uninfected T cells. The interaction between pUL11 and CD45 inhibits  
283 the phosphatase activity of CD45, which in turn impairs TCR signaling and ultimately, T  
284 cell proliferation (64, 65). Inhibition of CD45 by pUL11 also results in an increase in  
285 production of the anti-inflammatory cytokine IL-10 (65). In HHV6A infection, the

286 concentration of secreted IL-10 protein was shown to be increased during HHV6A  
287 infection at timepoints up to 72 hours post-infection (66, 67). Since the inhibition of  
288 CD45 during HCMV infection results in an increase in IL-10 production (65), it is  
289 tempting to speculate that the downregulation of CD45 we observe in HHV6A-infected T  
290 cells may be involved in the increase in IL-10 levels shown to occur during HHV6A  
291 infection.

292 Another virus that devotes an open reading frame to the downregulation of CD45 is  
293 Adenovirus19a (Ad19a). Ad19a E3/49K protein is cleaved to a secreted form (sec49K)  
294 that interacts with CD45 on nearby uninfected NK cells and T cells. Sec49K-mediated  
295 inhibition of CD45 suppresses T cell activation and signaling, resulting in diminished  
296 production of the anti-viral cytokine IFN- $\gamma$ , and inhibition of NK cell activation (68). After  
297 HHV6A infection of stimulated peripheral blood mononuclear cells, the production of  
298 IFN- $\gamma$  was also reported to be reduced (66). Since inhibition of CD45 function during  
299 adenovirus infection results in a decrease in IFN- $\gamma$  production (68), it is possible that the  
300 decrease reported in IFN- $\gamma$  production during HHV6A infection may occur as a result of  
301 CD45 downregulation in infected T cells.

302 Unlike HCMV pUL11 and Ad19a sec49K, which act extracellularly to inhibit CD45,  
303 MCMV encodes a protein, m42, that induces the internalization and degradation of  
304 CD45 within MCMV-infected macrophages (60). MCMV m42 acts as an adaptor or  
305 activator of HECT3 E3 ubiquitin ligases, and through ubiquitination, m42 marks CD45  
306 for lysosomal degradation (60). The functional outcome of m42-mediated  
307 downregulation of CD45 in MCMV-infected macrophages is unclear. HHV6A-mediated  
308 downregulation of CD45 is similar to MCMV-mediated downregulation of CD45, in that

309 these viruses downregulate CD45 from within infected cells, as opposed to acting on  
310 CD45 *in trans* on the surface of nearby uninfected cells. As yet, the functional outcome  
311 of downregulating CD45 within either of these infected immune cells remains elusive.

312 The roseolovirus genomes lack positional or functional homologs of MCMV m42 or  
313 HCMV pUL11, and unlike HCMV, MCMV, and Ad19a, HHV6A infection results in the  
314 dramatic transcriptional downregulation of CD45. HHV6A therefore downregulates  
315 CD45 by a novel mechanism. The separate evolution of four unique mechanisms to  
316 target a single host protein strongly suggests that CD45 is an important viral target,  
317 though its impact is unclear: how might the roseoloviruses benefit from the  
318 downregulation of CD45 in infected T cells? As discussed above, while the influence of  
319 CD45 downregulation on cytokine production would certainly benefit HHV6A, it is  
320 important to note that HHV6A preferentially infects T cells. Since it takes days to mount  
321 a virus-specific T cell response, during a primary infection, the T cells that HHV6A  
322 infects are not likely to be HHV6A-specific. Therefore, downregulation of CD45 in  
323 infected T cells would not directly impair activation of T cells responding to HHV6A  
324 infection. Instead, downregulation of CD45 may be a means to inhibit activation of the  
325 HHV6A-infected T cell, possibly preventing activation-induced cell death, and creating a  
326 host cell environment conducive to harboring latent virus. Future work is focused on  
327 identification of the HHV6A gene products involved in the transcriptional regulation of  
328 CD45 and exploring the functional consequences of CD45 downregulation in  
329 roseolovirus-infected T cells.

330

331 **Materials & Methods**

332 *Cell lines and viruses*

333 JJhan, ND10<sup>depl</sup> JJhan, and J.CD45 T cells were cultured in RPMI-1640 medium  
334 (ThermoFisher Scientific, Waltham, MA) supplemented with 5% fetal bovine serum  
335 (FBS) and 2 mM L-glutamine. JJhan cells depleted of ND10 (ND10<sup>depl</sup> JJhan cells) were  
336 the kind gift of Dr. Benedikt Kaufer (Freie Universität, Berlin, Germany) (69). J.CD45  
337 cells (CD45 -negative Jurkat cells) were kindly provided by Dr. Arthur Weiss (UCSF,  
338 San Francisco, CA) (70). 293T cells were cultured in Dulbecco's modified Eagle  
339 medium (DMEM) (Invitrogen, Carlsbad, CA) supplemented with 5% FBS, 5% newborn  
340 calf serum, and 2 mM L-glutamine. The HHV6A virus used in these studies is a  
341 recombinant HHV6A virus (strain U1102) generated from a bacterial artificial  
342 chromosome (BAC) containing the HHV6A genome with GFP inserted between the U53  
343 and U54 ORFs (71). Infectious HHV6A virus was generated by electroporating HHV6A-  
344 GFP BAC DNA into JJhan T cells. HHV6A virus was propagated by mixing uninfected  
345 ND10-depleted Jhan cells with infected JJhan cells once HHV6A-infected JJhan cells  
346 were >80% GFP+. HHV6A-infected and uninfected JJhan cells as well as J.CD45 cells  
347 were stimulated with 3.75 ug/ml Phytohemagglutinin (PHA-P) and 9 ug/ml  
348 hydrocortisone. HHV6A-infected cells used for experiments in this study were  $\geq 70\%$   
349 GFP+ at the time of harvest. SupT1 cells were cultured in RPMI-1640 medium  
350 supplemented with 2.5% FBS and 2 mM L-Glutamine. HHV-7 infection (strain SB) was  
351 performed by co-culture of HHV7-infected SupT1 cells with uninfected SupT1 cells.

352



353 *Antibodies & reagents*

354 The monoclonal anti-human CD45 antibody (clone S5-Z6, Santa Cruz Biotechnology,  
355 Dallas, TX) was used for flow cytometry (1 ug/ 1 x10<sup>6</sup> cells), immunofluorescence  
356 microscopy (1:50), and immunoblotting (1:50). The monoclonal anti-CD45 antibody  
357 (clone MEM-28, Millipore-Sigma, St. Louis, MO) was used for immunofluorescence  
358 microscopy (1:200). The polyclonal antibody MCW62 (U21-N) was raised against the N-  
359 terminus of HHV-7 U21 (1:400) (72). AlexaFluor-405, -488, -594, and -647-conjugated  
360 goat-anti mouse and rabbit secondary antibodies were used at dilutions recommended  
361 by the manufacturer (ThermoFisher Scientific). Chemicals were purchased from Sigma  
362 Millipore unless otherwise noted.

363 *Identification of cell surface N-glycoproteins*

364 Cell Surface Capture (CSC) was applied to control JJhan and HHV6A-infected JJhan T  
365 cells (10 million cells per replicate, three biological replicates per condition). Briefly,  
366 extracellular glycans on intact cells were oxidized using sodium meta-periodate, and the  
367 resulting aldehydes were labelled with biocytin hydrazide to form a 'handle' for  
368 enrichment. Cells were then lysed, proteins enzymatically digested, and biotinylated  
369 glycopeptides were enriched using streptavidin beads. N-glycopeptides were then  
370 selectively released by Peptide-N-Glycosidase F (PNGase:F) and analysed by mass  
371 spectrometry. Here, CSC was performed as previously described in detail (47-50), with  
372 the exception that glycopeptide enrichment and bead washing was performed using an  
373 epMotion 5073m (Eppendorf, Hamburg, Germany). For each sample, 750 µg of total  
374 peptide was diluted in binding buffer (80 mM sodium phosphate, 2 M NaCl, 0.2% Tween

375 20, pH 7.8) and incubated with 100 $\mu$ L of GenScript Streptavidin MagBeads (GenScript,  
376 Piscataway, NJ) for 1 h with mixing. Beads were then washed sequentially with: (1) 2%  
377 sodium dodecyl sulfate in ultrapure water, (2) 80 mM sodium phosphate, 2 M NaCl,  
378 0.2% Tween 20, pH 7.8, (3) 100 mM sodium carbonate, (4) 80% isopropyl alcohol in  
379 ultrapure water, (5) ultrapure water, and (6) 50 mM ammonium bicarbonate. Peptides  
380 were released by digestion with PNGase F (Promega, Madison, WI) overnight at 37 °C  
381 with vortexing. Deglycosylated peptides were cleaned and desalted using the SP2  
382 procedure (73). Peptide Retention Time Calibration (PRTC) Mixture (ThermoFisher  
383 Scientific) was added to each sample at a final concentration of 2 nM to enable  
384 retention time calibration and assessment of instrument performance throughout the  
385 acquisition. A “pooled QC” mixture was generated by combining equal portions of each  
386 sample. Individual samples were queued in a randomized order within a technical  
387 injection series with two technical replicates each. Pooled QC samples were analyzed  
388 at the beginning and end of each technical injection series. Samples were analyzed by  
389 liquid chromatography tandem mass spectrometry (LC-MS/MS) using a Dionex UltiMate  
390 3000 RSLCnano system in-line with an Orbitrap Fusion Lumos (ThermoFisher  
391 Scientific), and data were analysed with Proteome Discoverer 2.3 and Skyline (38).  
392 Normalized quantitation ratios were determined by comparisons of each sample type to  
393 the pooled QC.

#### 394 *Immunofluorescence microscopy*

395 T cells were adhered onto poly-L-lysine-coated glass coverslips as described in (74)  
396 and permeabilized in 0.5% saponin in PBS + 3% BSA + 880  $\mu$ M Ca<sup>2+</sup> + 490  $\mu$ M Mg<sup>2+</sup>.  
397 Permeabilized cells were incubated with primary antibodies, washed, and then

398 incubated with secondary antibodies conjugated to a fluorophore. 4',6-diamidino-2-  
399 phenylindole (DAPI) was added to the final PBS wash at 1 ug/ml to stain DNA.  
400 Superresolution microscopy was performed on a Nikon Structured-Illumination  
401 Microscope (N-SIM; Nikon) and NIS-Elements AR imaging and 3D reconstruction  
402 software (v. 5.11) (Nikon Instruments Inc, Melville, NY). Images were taken using a  
403 Nikon 100X Oil-immersion lens (CFI Apo SR TIRF 1.49 NA) and an Andor iXon+897  
404 EMCCD camera. Confocal microscopy was performed on a Nikon Eclipse Ti2  
405 microscope equipped with a W1 Spinning Disc, Orca Flash CMOS camera, and 100X  
406 oil-immersion objective (CFI Plan Apo  $\lambda$  1.49 NA), and NIS-Elements AR imaging and  
407 3D reconstruction software (v. 6.0).

#### 408 *Flow cytometry*

409 Cells were incubated with primary antibodies in 1% bovine serum albumin (BSA) in  
410 DMEM -phenol red for 30 min on ice, washed, and incubated with secondary antibodies.  
411 Flow cytometry was performed using an LSRII flow cytometer (BD Biosciences, San  
412 Jose, CA). Data was analyzed using FlowJo analysis software (v. 10.7, BD  
413 Biosciences). Infected cells were selectively analyzed by GFP+ gating. Non-viable cells  
414 were excluded from all flow cytometric analyses.

#### 415 *Immunoblotting*

416 Cell lysates were prepared using 1% Triton Tx-100 lysis buffer supplemented with 62.5  
417 U/ml Benzonase and 174  $\mu$ g/ml phenylmethylsulfonyl fluoride (PMSF) followed by the  
418 addition of an equal volume of 2% sodium dodecyl sulfate (SDS) and 100 mM Tris-HCl  
419 (pH 7.4). Lysates were normalized to total protein concentration as determined by

420 bicinchronic acid (BCA) assay (Pierce, Rockford, IL). Lysates were resolved by SDS-  
421 PAGE and transferred to BA-85 nitrocellulose membrane (Cytivia, Marlborough, MA).  
422 Membranes were incubated with primary antibodies, followed by HRP-conjugated  
423 secondary antibody (BioRad Laboratories, Hercules, CA). Bands were visualized using  
424 SuperSignal West Pico reagent (ThermoFisher Scientific) imaged with an Azure c600  
425 gel documentation system and quantified using AzureSpot software (v2.2.167) (Azure  
426 Biosystems, Dublin, CA).

#### 427 *Inhibition of protein degradation*

428 HHV6A-infected or uninfected JJhan cells were incubated in RPMI in 50 mM NH<sub>4</sub>Cl, 100  
429 nM MG-132, or a DMSO control for 19 hours. Cells were then divided for use in  
430 immunofluorescence microscopy or immunoblot analysis.

#### 431 *qRT-PCR*

432 Cells were lysed in TRIzol (Invitrogen, Carlsbad, CA) according to the manufacturer's  
433 instructions. Approximately 2 ug of RNA was treated with an AccuRT Genomic DNA  
434 Removal Kit (Applied Biological Materials, Richmond, BC, Canada) prior to cDNA  
435 synthesis using the 5X All-In-One Master mix (Applied Biological Materials), both  
436 according to the manufacturer's instructions. qPCR was performed using a BioRad  
437 CFX96 Real-Time System (BioRad Laboratories, Hercules, CA) and data analyzed  
438 using BioRad CFX Maestro (v.4.1.2433.1219). CD45 RNA levels were normalized to a  
439 cellular control for each sample (28S rRNA). Primer sets are listed in [Table 1](#). All qPCR  
440 reactions were run in technical triplicate with corresponding no template and -RT  
441 controls, which did not exceed background levels. The delta-delta C<sub>t</sub> method was used

442 to calculate the relative abundance of CD45 cDNA from HHV6A-infected JJhan cells  
443 and 293T cells relative to the uninfected JJhan cell control.

444 Table 1. Primers used in this study.

|                |                         |
|----------------|-------------------------|
| CD45 qRT4 FWD  | AAAAGTGCTCCTCCAAGCCA    |
| CD45 qRT4 REV  | TGGGAGGCCTACACTTGACA    |
| 28S rRNA 3783F | GTGACGCGCATGAATGGA      |
| 28S rRNA 3846R | TGTGGTTTCGCTGGATAGTAGGT |

445 *Statistical analysis*

446 Statistical analysis was done using GraphPad 8 (v.8.4.3). One-way ANOVA analysis  
447 with Tukey's multiple comparisons test was used to compare the abundance of CD45  
448 mRNA 293T cells, uninfected JJhan cells, and HHV6A-infected T cells. \*\*\*\*  $< 0.0001$

449 **Acknowledgements**

450 The authors thank Rebekah Mokry for helpful discussion, Drs. Benedikt Kaufer, Arthur  
451 Weiss, Vera Tarakanova, Ken Brockman, and Scott Terhune for generous provision of  
452 reagents and helpful discussion. We acknowledge funding from National Institutes of  
453 Health under Award Numbers AI123745 to AWH and RLG, HL134010 to RLG, and the  
454 American Heart Association 20PRE35200049 to LBL. LBL is a member of the MCW  
455 Medical Scientist Training Program, partially supported by NIH T32 GM080202.

456 References Cited

- 457
- 458 1. Zerr DM, Meier AS, Selke SS, Frenkel LM, Huang ML, Wald A, Rhoads MP, Nguy L, Bornemann R, Morrow  
459 RA, Corey L. 2005. A population-based study of primary human herpesvirus 6 infection. *N Engl J Med*  
460 352:768-76.
- 461
- 462 2. Yamanishi K, Shiraki K, Kondo T, Okuno T, Takahashi M, Asano Y, Kurata T. 1988. Identification of human  
463 herpesvirus-6 as a causal agent for exanthem subitum *The Lancet* 331:1065-1067.
- 464
- 465 3. Omasits U, Ahrens CH, Müller S, Wollscheid B. 2014. Protter: interactive protein feature visualization and  
466 integration with experimental proteomic data. *Bioinformatics* 30:884-6.
- 467
- 468 4. Emmanuel J, Wiertz TRJ, Lei Sun, Matthew Bogoyo, Hans J. Geuze, Hidde L. Ploegh. 1996. The Human  
469 Cytomegalovirus US11 Gene Product Dislocates MHC Class I Heavy Chains from the Endoplasmic Reticulum  
470 to the Cytosol. *Cell* 84:769-779.
- 471
- 472 5. Jones TR, Sun L. 1997. Human cytomegalovirus US2 destabilizes major histocompatibility complex class I  
473 heavy chains. *J Virol* 71:2970-2979.
- 474
- 475 6. Elboim M, Grodzovski I, Djian E, Wolf DG, Mandelboim O. 2013. HSV-2 specifically down regulates HLA-C  
476 expression to render HSV-2-infected DCs susceptible to NK cell killing. *PLoS Pathog* 9:e1003226.
- 477
- 478 7. Imai T, Koyanagi N, Ogawa R, Shindo K, Suenaga T, Sato A, Arii J, Kato A, Kiyono H, Arase H, Kawaguchi Y.  
479 2013. Us3 kinase encoded by herpes simplex virus 1 mediates downregulation of cell surface major  
480 histocompatibility complex class I and evasion of CD8+ T cells. *PLoS One* 8:e72050.
- 481
- 482 8. D.J. Schust ABH, H. L. Ploegh. 1996. Herpes simplex virus blocks intracellular transport of HLA-G in  
483 placentally derived human cells. *Journal of Immunology* 157:3375-3380.
- 484
- 485 9. Früh K, Ahn K, Djaballah H, Sempe P, van Endert P, Tampe R, Peterson P, Yang Y. 1995. A viral inhibitor of  
486 peptide transporters for antigen presentation. *Nature* 375:415-418.
- 487
- 488 10. A.York CR, D. W. Andrews, S. R. Riddell, F. L. Graham, D. C. Johnson. 1994. A cytosolic herpes simplex virus  
489 protein inhibits antigen presentation to CD8+ T lymphocytes *Cell* 20:525-535.
- 490
- 491 11. Keating S, Prince S, Jones M, Rowe M. 2002. The lytic cycle of Epstein-Barr virus is associated with  
492 decreased expression of cell surface major histocompatibility complex class I and class II molecules. *J Virol*  
493 76:8179-88.
- 494
- 495 12. Glosnon NL, Hudson A. 2007. Human herpesvirus-6A and -6B encode viral immunoevasins that  
496 downregulate class I MHC molecules. *Virology* 365:125-135.
- 497
- 498 13. Hudson AW, Howley PM, Ploegh HL. 2001. A human herpesvirus 7 glycoprotein, U21, diverts major  
499 histocompatibility complex class I molecules to lysosomes. *J Virol* 75:12347-58.
- 500
- 501 14. Dassa L, Seidel E, Oiknine-Djian E, Yamin R, Wolf DG, Le-Trilling VTK, Mandelboim O. 2018. The Human  
502 Cytomegalovirus Protein UL148A Downregulates the NK Cell-Activating Ligand MICA To Avoid NK Cell  
503 Attack. *J Virol* 92.
- 504
- 505 15. Seidel E, Le VTK, Bar-On Y, Tsukerman P, Enk J, Yamin R, Stein N, Schmiedel D, Oiknine Djian E, Weisblum  
506 Y, Tirosh B, Stastny P, Wolf DG, Hengel H, Mandelboim O. 2015. Dynamic Co-evolution of Host and  
507 Pathogen: HCMV Downregulates the Prevalent Allele MICA\*008 to Escape Elimination by NK Cells. *Cell*  
508 Rep 10:968-982.

- 509  
510 16. Fielding CA, Aicheler R, Stanton RJ, Wang EC, Han S, Seirafian S, Davies J, McSharry BP, Weekes MP,  
511 Antrobus PR, Prod'homme V, Blanchet FP, Sugrue D, Cuff S, Roberts D, Davison AJ, Lehner PJ, Wilkinson  
512 GW, Tomasec P. 2014. Two novel human cytomegalovirus NK cell evasion functions target MICA for  
513 lysosomal degradation. *PLoS Pathog* 10:e1004058.  
514  
515 17. Stern-Ginossar N, Elefant N, Zimmermann A, Wolf DG, Saleh N, Biton M, Horwitz E, Prokocimer Z, Prichard  
516 M, Hahn G, Goldman-Wohl D, Greenfield C, Yagel S, Hengel H, Altuvia Y, Margalit H, Mandelboim O. 2007.  
517 Host immune system gene targeting by a viral miRNA. *Science* 317:376-81.  
518  
519 18. Rölle A, Mousavi-Jazi M, Eriksson M, Odeberg J, Söderberg-Nauclér C, Cosman D, Kärre K, Cerboni C. 2003.  
520 Effects of human cytomegalovirus infection on ligands for the activating NKG2D receptor of NK cells: up-  
521 regulation of UL16-binding protein (ULBP)1 and ULBP2 is counteracted by the viral UL16 protein. *The*  
522 *Journal of Immunology* 171:902-908.  
523  
524 19. Schneider CL, Hudson A. 2011. The human herpesvirus-7 (HHV-7) U21 immunoevasin subverts NK-  
525 mediated cytotoxicity through modulation of MICA and MICB. *PLoS Pathog* 7:e1002362.  
526  
527 20. Anders S, Huber W. 2010. Differential expression analysis for sequence count data. *Genome Biol* 11:R106.  
528  
529 21. Bonifacino JS, Dell'Angelica EC. 2001. Immunoprecipitation. *Current protocols in cell biology / editorial*  
530 *board, Juan S Bonifacino [et al] Chapter 7:Unit 7.2.*  
531  
532 22. Peretti S, Shaw A, Blanchard J, Bohm R, Morrow G, Lifson JD, Gettie A, Pope M. 2005. Immunomodulatory  
533 effects of HSV-2 infection on immature macaque dendritic cells modify innate and adaptive responses.  
534 *Blood* 106:1305-13.  
535  
536 23. Morrow G, Slobedman B, Cunningham AL, Abendroth A. 2003. Varicella-zoster virus productively infects  
537 mature dendritic cells and alters their immune function. *J Virol* 77:4950-9.  
538  
539 24. Mikloska Z, Bosnjak L, Cunningham AL. 2001. Immature monocyte-derived dendritic cells are productively  
540 infected with herpes simplex virus type 1. *J Virol* 75:5958-64.  
541  
542 25. Andrews DM, Andoniou CE, Granucci F, Ricciardi-Castagnoli P, Degli-Esposti MA. 2001. Infection of  
543 dendritic cells by murine cytomegalovirus induces functional paralysis. *Nat Immunol* 2:1077-84.  
544  
545 26. Salio M, Cella M, Suter M, Lanzavecchia A. 1999. Inhibition of dendritic cell maturation by herpes simplex  
546 virus. *Eur J Immunol* 29:3245-53.  
547  
548 27. Jones D, Como CN, Jing L, Blackmon A, Neff CP, Krueger O, Bubak AN, Palmer BE, Koelle DM, Nagel MA.  
549 2019. Varicella zoster virus productively infects human peripheral blood mononuclear cells to modulate  
550 expression of immunoinhibitory proteins and blocking PD-L1 enhances virus-specific CD8+ T cell effector  
551 function. *PLoS Pathog* 15:e1007650.  
552  
553 28. Gilardini Montani MS, Santarelli R, Falcinelli L, Gonnella R, Granato M, Di Renzo L, Cuomo L, Vitillo M,  
554 Faggioni A, Cirone M. 2018. EBV up-regulates PD-L1 on the surface of primary monocytes by increasing  
555 ROS and activating TLR signaling and STAT3. *J Leukoc Biol* 104:821-832.  
556  
557 29. Host KM, Jacobs SR, West JA, Zhang Z, Costantini LM, Stopford CM, Dittmer DP, Damania B. 2017. Kaposi's  
558 Sarcoma-Associated Herpesvirus Increases PD-L1 and Proinflammatory Cytokine Expression in Human  
559 Monocytes. *mBio* 8.  
560

- 561 30. McSharry BP, Forbes SK, Cao JZ, Avdic S, Machala EA, Gottlieb DJ, Abendroth A, Slobedman B. 2014.  
562 Human cytomegalovirus upregulates expression of the lectin galectin 9 via induction of beta interferon. *J*  
563 *Virol* 88:10990-4.  
564
- 565 31. Reddy PB, Sehrawat S, Suryawanshi A, Rajasagi NK, Mulik S, Hirashima M, Rouse BT. 2011. Influence of  
566 galectin-9/Tim-3 interaction on herpes simplex virus-1 latency. *J Immunol* 187:5745-55.  
567
- 568 32. Benedict CA, Loewendorf A, Garcia Z, Blazar BR, Janssen EM. 2008. Dendritic cell programming by  
569 cytomegalovirus stunts naive T cell responses via the PD-L1/PD-1 pathway. *J Immunol* 180:4836-47.  
570
- 571 33. Weekes MP, Tomasec P, Huttlin EL, Fielding CA, Nusinow D, Stanton RJ, Wang ECY, Aicheler R, Murrell I,  
572 Wilkinson GWG, Lehner PJ, Gygi SP. 2014. Quantitative temporal viromics: an approach to investigate  
573 host-pathogen interaction. *Cell* 157:1460-1472.  
574
- 575 34. Barteel E, McCormack A, Früh K. 2006. Quantitative membrane proteomics reveals new cellular targets of  
576 viral immune modulators. *PLoS Pathog* 2:e107.  
577
- 578 35. Hertel L, Lacaille VG, Strobl H, Mellins ED, Mocarski ES. 2003. Susceptibility of immature and mature  
579 Langerhans cell-type dendritic cells to infection and immunomodulation by human cytomegalovirus. *J*  
580 *Virol* 77:7563-74.  
581
- 582 36. Coscoy L, Ganem D. 2001. A viral protein that selectively downregulates ICAM-1 and B7-2 and modulates  
583 T cell costimulation. *J Clin Invest* 107:1599-606.  
584
- 585 37. Mansouri M, Douglas J, Rose PP, Gouveia K, Thomas G, Means RE, Moses AV, Früh K. 2006. Kaposi  
586 sarcoma herpesvirus K5 removes CD31/PECAM from endothelial cells. *Blood* 108:1932-40.  
587
- 588 38. MacLean B, Tomazela DM, Shulman N, Chambers M, Finney GL, Frewen B, Kern R, Tabb DL, Liebler DC,  
589 MacCoss MJ. 2010. Skyline: an open source document editor for creating and analyzing targeted  
590 proteomics experiments. *Bioinformatics* 26:966-8.
- 591 39. Rheinlander A, Schraven B, Bommhardt U. 2018. CD45 in human physiology and clinical medicine.  
592 *Immunol Lett* 196:22-32.  
593
- 594 40. Holmes N. 2006. CD45: all is not yet crystal clear. *Immunology* 117:145-55.  
595
- 596 41. Hermiston ML, Xu Z, Weiss A. 2003. CD45: a critical regulator of signaling thresholds in immune cells.  
597 *Annu Rev Immunol* 21:107-37.  
598
- 599 42. Sasaki T, Sasaki-Irie J, Penninger JM. 2001. New insights into the transmembrane protein tyrosine  
600 phosphatase CD45. *Int J Biochem Cell Biol* 33:1041-6.  
601
- 602 43. Koretzky GA, Picus J, Schultz T, Weiss A. 1991. Tyrosine phosphatase CD45 is required for T-cell antigen  
603 receptor and CD2-mediated activation of a protein tyrosine kinase and interleukin 2 production. *Proc Natl*  
604 *Acad Sci U S A* 88:2037-41.  
605
- 606 44. Koretzky GA, Picus J, Thomas ML, Weiss A. 1990. Tyrosine phosphatase CD45 is essential for coupling T-  
607 cell antigen receptor to the phosphatidylinositol pathway. *Nature* 346:66-8.  
608
- 609 45. Pingel JT, Thomas ML. 1989. Evidence that the leukocyte-common antigen is required for antigen-induced  
610 T lymphocyte proliferation. *Cell* 58:1055-65.  
611



- 612 46. Fujinaka CM, Waas M, Gundry RL. 2018. Mass Spectrometry-Based Identification of Extracellular Domains  
613 of Cell Surface N-Glycoproteins: Defining the Accessible Surfaceome for Immunophenotyping Stem Cells  
614 and Their Derivatives. *Methods Mol Biol* 1722:57-78.  
615
- 616 47. Mallanna SK, Waas M, Duncan SA, Gundry RL. 2017. N-glycoprotein surfaceome of human induced  
617 pluripotent stem cell derived hepatic endoderm. *Proteomics* 17.  
618
- 619 48. Mallanna SK, Cayo MA, Twaroski K, Gundry RL, Duncan SA. 2016. Mapping the Cell-Surface N-  
620 Glycoproteome of Human Hepatocytes Reveals Markers for Selecting a Homogeneous Population of iPSC-  
621 Derived Hepatocytes. *Stem Cell Reports* 7:543-556.  
622
- 623 49. Boheler KR, Bhattacharya S, Kropp EM, Chuppa S, Riordon DR, Bausch-Fluck D, Burrige PW, Wu JC,  
624 Wersto RP, Chan GC, Rao S, Wollscheid B, Gundry RL. 2014. A human pluripotent stem cell surface N-  
625 glycoproteome resource reveals markers, extracellular epitopes, and drug targets. *Stem Cell Reports*  
626 3:185-203.  
627
- 628 50. Wollscheid B, Bausch-Fluck D, Henderson C, O'Brien R, Bibel M, Schiess R, Aebersold R, Watts JD. 2009.  
629 Mass-spectrometric identification and relative quantification of N-linked cell surface glycoproteins. *Nat*  
630 *Biotechnol* 27:378-86.  
631
- 632 51. Pawelec G, Borowitz A, Krammer PH, Wernet P. 1982. Constitutive interleukin 2 production by the JURKAT  
633 human leukemic T cell line. *Eur J Immunol* 12:387-392.  
634
- 635 52. Dölken L, Krmpotić A, Kothe S, Tuddenham L, Tanguy M, Marcinowski L, Ruzsics Z, Elefant N, Altuvia Y,  
636 Margalit H, Koszinowski UH, Jonjić S, Pfeffer S. 2010. Cytomegalovirus microRNAs facilitate persistent  
637 virus infection in salivary glands. *PLoS Pathog* 6:e1001150.  
638
- 639 53. Hall LR, Streuli M, Schlossman SF, Saito H. 1988. Complete exon-intron organization of the human  
640 leukocyte common antigen (CD45) gene. *J Immunol* 141:2781-7.  
641
- 642 54. Streuli M, Hall LR, Saga Y, Schlossman SF, Saito H. 1987. Differential usage of three exons generates at  
643 least five different mRNAs encoding human leukocyte common antigens. *J Exp Med* 166:1548-66.  
644
- 645 55. Ralph SJ, Thomas ML, Morton CC, Trowbridge IS. 1987. Structural variants of human T200 glycoprotein  
646 (leukocyte-common antigen). *Embo j* 6:1251-7.  
647
- 648 56. Rothstein DM, Saito H, Streuli M, Schlossman SF, Morimoto C. 1992. The alternative splicing of the CD45  
649 tyrosine phosphatase is controlled by negative regulatory trans-acting splicing factors. *J Biol Chem*  
650 267:7139-47.  
651
- 652 57. Sullivan BM, Coscoy L. 2008. Downregulation of the T-cell receptor complex and impairment of T-cell  
653 activation by human herpesvirus 6 u24 protein. *J Virol* 82:602-8.  
654
- 655 58. Nicholas J. 1996. Determination and analysis of the complete nucleotide sequence of human herpesvirus-  
656 7. *J Virol* 70:5975-5989.  
657
- 658 59. Isegawa Y, Mukai T, Nakano K, Kagawa M, Chen J, Mori Y, Sunagawa T, Kawanishi K, Sashihara J, Hata A,  
659 Zou P, Kosuge H, Yamanishi K. 1999. Comparison of the complete DNA sequences of human herpesvirus 6  
660 variants A and B. *J Virol* 73:8053-63.  
661
- 662 60. Thiel N, Keyser KA, Lemmermann NA, Oduro JD, Wagner K, Elsner C, Halenius A, Lenac Rovis T, Brinkmann  
663 MM, Jonjić S, Cicin-Sain L, Messerle M. 2016. The Mouse Cytomegalovirus Gene m42 Targets Surface

- 664 Expression of the Protein Tyrosine Phosphatase CD45 in Infected Macrophages. *PLoS Pathog*  
665 12:e1006057.  
666
- 667 61. Mustelin T, Coggeshall KM, Altman A. 1989. Rapid activation of the T-cell tyrosine protein kinase pp56lck  
668 by the CD45 phosphotyrosine phosphatase. *Proc Natl Acad Sci U S A* 86:6302-6.  
669
- 670 62. Mustelin T, Altman A. 1990. Dephosphorylation and activation of the T cell tyrosine kinase pp56lck by the  
671 leukocyte common antigen (CD45). *Oncogene* 5:809-13.  
672
- 673 63. Mustelin T, Pessa-Morikawa T, Autero M, Gassmann M, Andersson LC, Gahmberg CG, Burn P. 1992.  
674 Regulation of the p59fyn protein tyrosine kinase by the CD45 phosphotyrosine phosphatase. *Eur J*  
675 *Immunol* 22:1173-8.  
676
- 677 64. Gabaev I, Steinbruck L, Pokoyski C, Pich A, Stanton RJ, Schwinzer R, Schulz TF, Jacobs R, Messerle M, Kay-  
678 Fedorov PC. 2011. The human cytomegalovirus UL11 protein interacts with the receptor tyrosine  
679 phosphatase CD45, resulting in functional paralysis of T cells. *PLoS Pathog* 7:e1002432.  
680
- 681 65. Zischke J, Mamareli P, Pokoyski C, Gabaev I, Buyny S, Jacobs R, Falk CS, Lochner M, Sparwasser T, Schulz  
682 TF, Kay-Fedorov PC. 2017. The human cytomegalovirus glycoprotein pUL11 acts via CD45 to induce T cell  
683 IL-10 secretion. *PLoS Pathog* 13:e1006454.  
684
- 685 66. Arena A, Liberto MC, Iannello D, Capozza AB, Focà A. 1999. Altered cytokine production after human  
686 herpes virus type 6 infection. *New Microbiol* 22:293-300.  
687
- 688 67. Li C, Goodrich JM, Yang X. 1997. Interferon-gamma (IFN-gamma) regulates production of IL-10 and IL-12 in  
689 human herpesvirus-6 (HHV-6)-infected monocyte/macrophage lineage. *Clin Exp Immunol* 109:421-5.  
690
- 691 68. Windheim M, Southcombe JH, Kremmer E, Chaplin L, Urlaub D, Falk CS, Claus M, Mihm J, Braithwaite M,  
692 Dennehy K, Renz H, Sester M, Watzl C, Burgert HG. 2013. A unique secreted adenovirus E3 protein binds  
693 to the leukocyte common antigen CD45 and modulates leukocyte functions. *Proc Natl Acad Sci U S A*  
694 110:E4884-93.  
695
- 696 69. Sanyal A, Wallaschek N, Glass M, Flamand L, Wight DJ, Kaufer BB. 2018. The ND10 Complex Represses  
697 Lytic Human Herpesvirus 6A Replication and Promotes Silencing of the Viral Genome. *Viruses* 10.  
698
- 699 70. Courtney AH, Amacher JF, Kadlec TA, Mollenauer MN, Au-Yeung BB, Kuriyan J, Weiss A. 2017. A  
700 Phosphosite within the SH2 Domain of Lck Regulates Its Activation by CD45. *Mol Cell* 67:498-511.e6.  
701
- 702 71. Tang H, Kawabata A, Yoshida M, Oyaizu H, Maeki T, Yamanishi K, Mori Y. 2010. Human herpesvirus 6  
703 encoded glycoprotein Q1 gene is essential for virus growth. *Virology* 407:360-367.  
704
- 705 72. May NA, Wang Q, Balbo A, Konrad SL, Buchli R, Hildebrand WH, Schuck P, Hudson AW. 2014. Human  
706 herpesvirus 7 U21 tetramerizes to associate with class I major histocompatibility complex molecules. *J*  
707 *Virol* 88:3298-308.  
708
- 709 73. Waas M, Pereckas M, Jones Lipinski RA, Ashwood C, Gundry RL. 2019. SP2: Rapid and Automatable  
710 Contaminant Removal from Peptide Samples for Proteomic Analyses. *J Proteome Res* 18:1644-1656.  
711
- 712 74. Mihara K, Nakayama T, Saitoh H. 2015. A Convenient Technique to Fix Suspension Cells on a Coverslip for  
713 Microscopy. *Curr Protoc Cell Biol* 68:4 30 1-4 30 10.  
714
